# Supplementary material for: Drastic rearrangement of self-assembled hydrogen-bonded tapes in a molecular crystal
Source: Royal Society of Chemistry journal article supplement (doi:10.1039/c8cc04376k), 2018-01-01
Supplement: c8cc04376k1.pdf [file c8cc04376k1.pdf]

Electronic Supplementary Information (ESI) for

## **Drastic rearrangement of self-assembled hydrogen-bonded tapes in a molecular crystal**

Masaki Donoshita,<sup>a</sup> Mikihiro Hayashi,<sup>a</sup> Ryuichi Ikeda,<sup>a</sup> Yukihiro Yoshida,<sup>a</sup>  
Shota Morikawa,<sup>a</sup> Kunihisa Sugimoto,<sup>b</sup> and Hiroshi Kitagawa<sup>\*,a</sup>

<sup>a</sup>Division of Chemistry, Graduate School of Science, Kyoto University, Kitashirakawa-Oiwakecho, Sakyo-ku, Kyoto 606-8502, Japan

<sup>b</sup>Japan Synchrotron Radiation Research Institute (JASRI), SPring-8, 1-1-1 Kouto, Sayo-cho, Sayo-gun, Hyogo 679-5148, Japan

\*E-mail: kitagawa@kuchem.kyoto-u.ac.jp

### **Contents:**

#### **Experimental details**

**Table S1.** Cell parameters and crystallographic information for each form of 2:1 co-crystal of 2-pyrrolidone and chloranilic acid

**Movie S1.** Shape change in a crystal mounted on a glass fibre induced by a phase transition from High-A to Low-B upon cooling

**Movie S2.** Shape change in a crystal mounted on a glass fibre induced by a phase transition from Low-B to High-B upon heating

**Movie S3.** Schematic movie of the relationship between microscopic packing modulation and macroscopic shape change of a crystal during successive transitions (High-A → Low-B → High-B)

## Experimental Details

**Sample preparation:** Chloranilic acid (CA) was obtained from TCI Chemical Industry (Tokyo, Japan) and purified by recrystallization from aqueous solution. 2-Pyrrolidone (2-Py) was obtained from Nacalai Tesque (Kyoto, Japan) and used as received without further purification. Orange plate crystals of High-A were prepared by rapid cooling of a hot acetonitrile solution (120 mL) containing CA (2.12 g, 10.2 mmol) and 2-Py (3.40 g, 39.9 mmol) to room temperature (5.5 h), while stirring. Red rhombic block crystals of High-B were prepared by slow evaporation of an acetonitrile solution (1.01 L) containing CA (2.09 g, 10.0 mmol) and 2-Py (3.41 g, 40.0 mmol) at room temperature.

**Single-crystal X-ray structural analysis:** Crystallographic data at typical temperatures were collected using the synchrotron X-ray at the BL02B1 beam-line in SPring-8 with a Rigaku Mercury 2 CCD detector ( $\lambda = 0.703010 \text{ \AA}$ ).<sup>1</sup> Variable-temperature experiments were performed on a laboratory X-ray diffractometer (Rigaku XtaLAB P200) with graphite-monochromated Mo K $\alpha$  radiation ( $\lambda = 0.71073 \text{ \AA}$ ). A single crystal was mounted on a glass fibre with epoxy resin and cooled by a stream of cooled nitrogen gas. The structures were solved by direct methods (SHELXT<sup>2</sup>) and refined by full-matrix least-squares refinement on  $F^2$  (SHELXL<sup>3</sup>) using the CrystalStructure<sup>4</sup> software package. The positions of all atoms, including hydrogen atoms, were refined in the general least-squares cycle with no restraints. All non-hydrogen atoms were refined anisotropically, whereas hydrogen atoms were refined isotropically.

(1) Crystallographic data were deposited with the Cambridge Crystallographic Data Centre: deposition nos. CCDC 1838517 (High-A at 298 K), 1838519 (Low-B at 100 K), 1838518 (High-B at 298 K) and 1838516 (High-B at 100 K).

(2) G. M. Sheldrick, *Acta Crystallogr.*, 2015, **A71**, 3.

(3) G. M. Sheldrick, *Acta Crystallogr.*, 2008, **A64**, 112.

(4) CrystalStructure 4.2.5: Crystal Structure Analysis Package, Rigaku Corporation, Tokyo, Japan.

**Table S1.** Cell parameters and crystallographic information for each form of 2:1 co-crystal of 2-pyrrolidone and chloranilic acid

|                                                    | High-A                                                                        | Low-B <sup>a</sup>                                                            | High-B <sup>a</sup>                                                           | High-B <sup>a</sup>                                                           |
|----------------------------------------------------|-------------------------------------------------------------------------------|-------------------------------------------------------------------------------|-------------------------------------------------------------------------------|-------------------------------------------------------------------------------|
| Formula                                            | C <sub>14</sub> H <sub>16</sub> Cl <sub>2</sub> N <sub>2</sub> O <sub>6</sub> | C <sub>14</sub> H <sub>16</sub> Cl <sub>2</sub> N <sub>2</sub> O <sub>6</sub> | C <sub>14</sub> H <sub>16</sub> Cl <sub>2</sub> N <sub>2</sub> O <sub>6</sub> | C <sub>14</sub> H <sub>16</sub> Cl <sub>2</sub> N <sub>2</sub> O <sub>6</sub> |
| Formula weight                                     | 379.20                                                                        | 379.20                                                                        | 379.20                                                                        | 379.20                                                                        |
| Temperature (K)                                    | 298                                                                           | 100                                                                           | 298                                                                           | 100                                                                           |
| Wavelength (Å)                                     | 0.703010                                                                      | 0.703010                                                                      | 0.703010                                                                      | 0.703010                                                                      |
| Crystal system                                     | Triclinic                                                                     | Triclinic                                                                     | Triclinic                                                                     | Triclinic                                                                     |
| Space group                                        | <i>P</i> -1                                                                   | <i>P</i> -1                                                                   | <i>P</i> -1                                                                   | <i>P</i> -1                                                                   |
| Colour                                             | Orange                                                                        | Orange                                                                        | Orange                                                                        | Orange                                                                        |
| <i>a</i> (Å)                                       | 8.1575(9)                                                                     | 4.6904(17)                                                                    | 4.987(3)                                                                      | 4.9143(16)                                                                    |
| <i>b</i> (Å)                                       | 10.3671(12)                                                                   | 8.921(3)                                                                      | 7.592(4)                                                                      | 7.458(2)                                                                      |
| <i>c</i> (Å)                                       | 11.0921(13)                                                                   | 9.833(3)                                                                      | 11.718(6)                                                                     | 11.698(4)                                                                     |
| $\alpha$ (°)                                       | 74.290(5)                                                                     | 103.357(7)                                                                    | 72.926(6)                                                                     | 73.270(5)                                                                     |
| $\beta$ (°)                                        | 75.655(5)                                                                     | 96.447(7)                                                                     | 89.449(6)                                                                     | 89.528(6)                                                                     |
| $\gamma$ (°)                                       | 67.442(5)                                                                     | 93.984(7)                                                                     | 71.157(6)                                                                     | 69.737(5)                                                                     |
| <i>V</i> (Å <sup>3</sup> )                         | 822.93(17)                                                                    | 395.8(2)                                                                      | 399.6(4)                                                                      | 383.2(2)                                                                      |
| <i>Z</i>                                           | 2                                                                             | 1                                                                             | 1                                                                             | 1                                                                             |
| Calcd density (g cm <sup>-3</sup> )                | 1.530                                                                         | 1.591                                                                         | 1.576                                                                         | 1.643                                                                         |
| $\mu$ (mm <sup>-1</sup> )                          | 0.410                                                                         | 0.426                                                                         | 0.422                                                                         | 0.440                                                                         |
| <i>F</i> (000)                                     | 392                                                                           | 196                                                                           | 196                                                                           | 196                                                                           |
| Crystal size (mm <sup>3</sup> )                    | 0.09 × 0.04 × 0.01                                                            | 0.14 × 0.06 × 0.02                                                            | 0.14 × 0.06 × 0.02                                                            | 0.14 × 0.06 × 0.02                                                            |
| Total reflections                                  | 10883                                                                         | 5200                                                                          | 5228                                                                          | 4220                                                                          |
| Unique reflections                                 | 3744                                                                          | 1799                                                                          | 1821                                                                          | 1393                                                                          |
| Parameters used                                    | 281                                                                           | 141                                                                           | 141                                                                           | 141                                                                           |
| <i>R</i> <sub>int</sub>                            | 0.0603                                                                        | 0.0830                                                                        | 0.0658                                                                        | 0.0613                                                                        |
| Goodness-of-fit                                    | 0.946                                                                         | 1.028                                                                         | 0.944                                                                         | 1.065                                                                         |
| <i>R</i> <sub>1</sub> [ <i>I</i> > 2σ( <i>I</i> )] | 0.0491                                                                        | 0.0535                                                                        | 0.0520                                                                        | 0.0434                                                                        |
| <i>wR</i> <sub>2</sub> (all reflections)           | 0.1333                                                                        | 0.1428                                                                        | 0.1302                                                                        | 0.1120                                                                        |
| max, min Δρ (e Å <sup>-3</sup> )                   | 0.25, -0.24                                                                   | 0.60, -0.60                                                                   | 0.31, -0.23                                                                   | 0.38, -0.38                                                                   |

<sup>a</sup> Data taken from the same piece of single crystal during the temperature-sweeping process.
